1 **Title: WNT/ $\beta$ -catenin dependant alteration of cortical neurogenesis in a human stem cell**  
2 **model of SETBP1 disorder**

3

4 **Authors:** Lucia F. Cardo<sup>1\*</sup> and Meng Li<sup>1\*</sup>

5 **Affiliations:** <sup>1</sup>Neuroscience and Mental Health Research Institute, School of Medicine and  
6 School of Bioscience, Cardiff University

7

8 **\*Corresponding author:**

9 Mailing address: Neuroscience and Mental Health Research Institute, Hadyn Ellis building,

10 Maindy road, Cardiff, CF24 4HQ, United Kingdom

11 Phone: +44(0) 29 2068 8345

12 Email address: cardolf@cardiff.ac.uk, lim26@cf.ac.uk

13

14 **Running title:** SETBP1 regulation of cortical neurogenesis through WNT/ $\beta$ -catenin pathway.

15 **Keywords:** SETBP1, neural development, WNT signaling, cortical neurogenesis, stem cell  
16 model, CRISPR/Cas9

17 **Abstract**

18 Disruptions of *SETBP1* (SET binding protein 1) on 18q12.3 by heterozygous gene deletion or  
19 loss-of-function variants cause SETBP1 disorder. Clinical features are frequently associated  
20 with moderate to severe intellectual disability, autistic traits and speech and motor delays.  
21 Despite *SETBP1* association with neurodevelopmental disorders, little is known about its role  
22 in brain development. Using CRISPR/CAS9 genome editing technology, we generated a  
23 SETBP1 deletion model in human embryonic stem cells (hESCs), and examined the effects of  
24 SETBP1-deficiency in in vitro derived neural progenitors (NPCs) and neurons using a battery  
25 of cellular assays, genome wide transcriptomic profiling and drug-based phenotypic rescue.  
26 SETBP1-deficient NPCs exhibit protracted proliferation and distorted layer-specific neuronal  
27 differentiation with overall decrease in neurogenesis. Genome wide transcriptome profiling  
28 and protein biochemical analysis showed that SETBP1 deletion led to enhanced activation of  
29 WNT/ $\beta$ -catenin signaling. Crucially, treatment of the SETBP1-deficient NPCs with a small  
30 molecule WNT inhibitor XAV939 restored hyper canonical  $\beta$ -catenin activity and rescued  
31 cortical neuronal differentiation.  
32 Our study establishes a novel regulatory link between SETBP1 and WNT/ $\beta$ -catenin signaling  
33 during human cortical neurogenesis and provides mechanistic insights into structural  
34 abnormalities and potential therapeutic avenues for SETBP1 disorder.

## 35 INTRODUCTION

36 The cerebral cortex is the center of higher mental functions for humans and contains around  
37 100 billion cells that account for about 76% of the brain's volume. Normal cortical development  
38 involves a set of highly complex and organized events, including neural stem cell proliferation,  
39 neuronal differentiation and appropriate positioning and interconnection of both excitatory and  
40 inhibitory neurons(1-3). Abnormalities of cell proliferation or neurogenesis may cause  
41 malformations of the brain such as microcephaly, macrocephaly or cortical dysplasia. Cortical  
42 malformations and aberrant neural circuitry have been implicated as an important cause of  
43 neurological disorders such as intellectual disability, autism and developmental delay(4-7).

44 *SETBP1* gene is located at 18q12.3 and is associated with several neurodevelopmental  
45 disorders. SETBP1 haploinsufficiency due to heterozygous gene deletion or loss-of-function  
46 mutation cause SETBP1 disorder, a rare disorder with clinical features including expressive  
47 language impairment, intellectual disability, autistic-like traits, autism spectrum disorder  
48 (ASD), attention deficit hyperactivity disorder (ADHD), seizures, delayed motor skills and  
49 minor dysmorphic features amongst others(8-14). The disorder is also known as SETBP1  
50 haploinsufficiency disorder or Mental Retardation Dominant 29 (MIM #616078). Its strong  
51 association with a phenotype of developmental delay with language disorder, makes SETBP1  
52 a new candidate gene for speech disorders(8, 12, 15, 16). In contrast, point mutations of  
53 *SETBP1* result in SETBP1 gain-of-function due to impairment in its degradation(17) and  
54 causes a different disorder called Schinzel-Giedion syndrome (SGS). SGS is a severe multi-  
55 organ disorder characterized by distinctive facial features, profound neurodevelopmental and  
56 structural anomalies and higher prevalence of myeloid leukaemia(18-20). Despite its clear  
57 association with several neurodevelopmental disorders, the function of SETBP1 in the  
58 developing brain remains unknown.

59 Human embryonic stem cells (hESCs) offer an infinite cell source for the generation of neural  
60 progenitors (NPCs) and neurons, and have proved to be an invaluable *in vitro* model for  
61 studying human neurodevelopment and associated neurological disorders. HESCs provide an  
62 isogenic model with defined genetic background in which disease-associated mutations can be  
63 generated using genome editing tools, such as the state-of-the-art CRISPR/CAS9 genome  
64 editing technology(21-23). In this study, we generated a SETBP1 loss-of-function hESC model  
65 via CRISPR/CAS9 assisted gene targeting and investigated its impact on cortical neuronal  
66 differentiation.

## 67 **RESULTS**

### 68 **Generation of SETBP1-deficient hESC lines**

69 CRISPR/CAS9 genome editing technology was employed to generate a hESC model of  
70 *SETBP1* deletion. A classic gene targeting vector was designed for creating a defined deletion  
71 by homologous recombination in exon 4, which encodes two AT hooks, SKI homologous  
72 region and SET binding domain of SETBP1 protein. To guide Cas9 cleavage of the target  
73 DNA, three gRNAs were co-transfected with the donor template. Independent hESC clones  
74 were screened for homologous recombination by PCR followed by Sanger sequencing (Fig.  
75 1A, 1B and Fig. S1A). Three heterozygous (*SETBP1*<sup>+/-</sup>) lines were obtained from the first  
76 round of gene targeting, which introduced an early stop codon in the mutant allele and is  
77 predicted to produce a truncated protein of 475 of the 1596 amino acid full protein sequence  
78 (Fig. 1C). One of this lines (HET1) was subjected to a second round of editing using the same  
79 gRNAs without the donor template, yielding several independent clones containing a 5bp  
80 deletion in the other allele (ie. Homozygous *SETBP1* mutant lines, Fig. S1B and Fig. S1C).  
81 This 5bp deletion introduced a premature stop codon in the second allele and is predicted to  
82 produce a truncated protein of 1220 amino acid ([www.expasy.org](http://www.expasy.org). Fig. 1C).

83 Three homozygous SETBP1 mutant hESC lines (KO1, KO2 and KO3, referred together as  
84 SETBP1<sup>-/-</sup>), along with two SETBP1<sup>+/-</sup> lines, were chosen for subsequent studies. The  
85 SETBP1 edited lines exhibited characteristic pluripotent stem cell (PSC) morphology,  
86 expressed pluripotency markers OCT4 and SOX2, and grew at a similar rate to that of H7 (Fig.  
87 1D). Moreover, they have normal karyotype (46, XX) in 73-82% of total metaphases analysed.

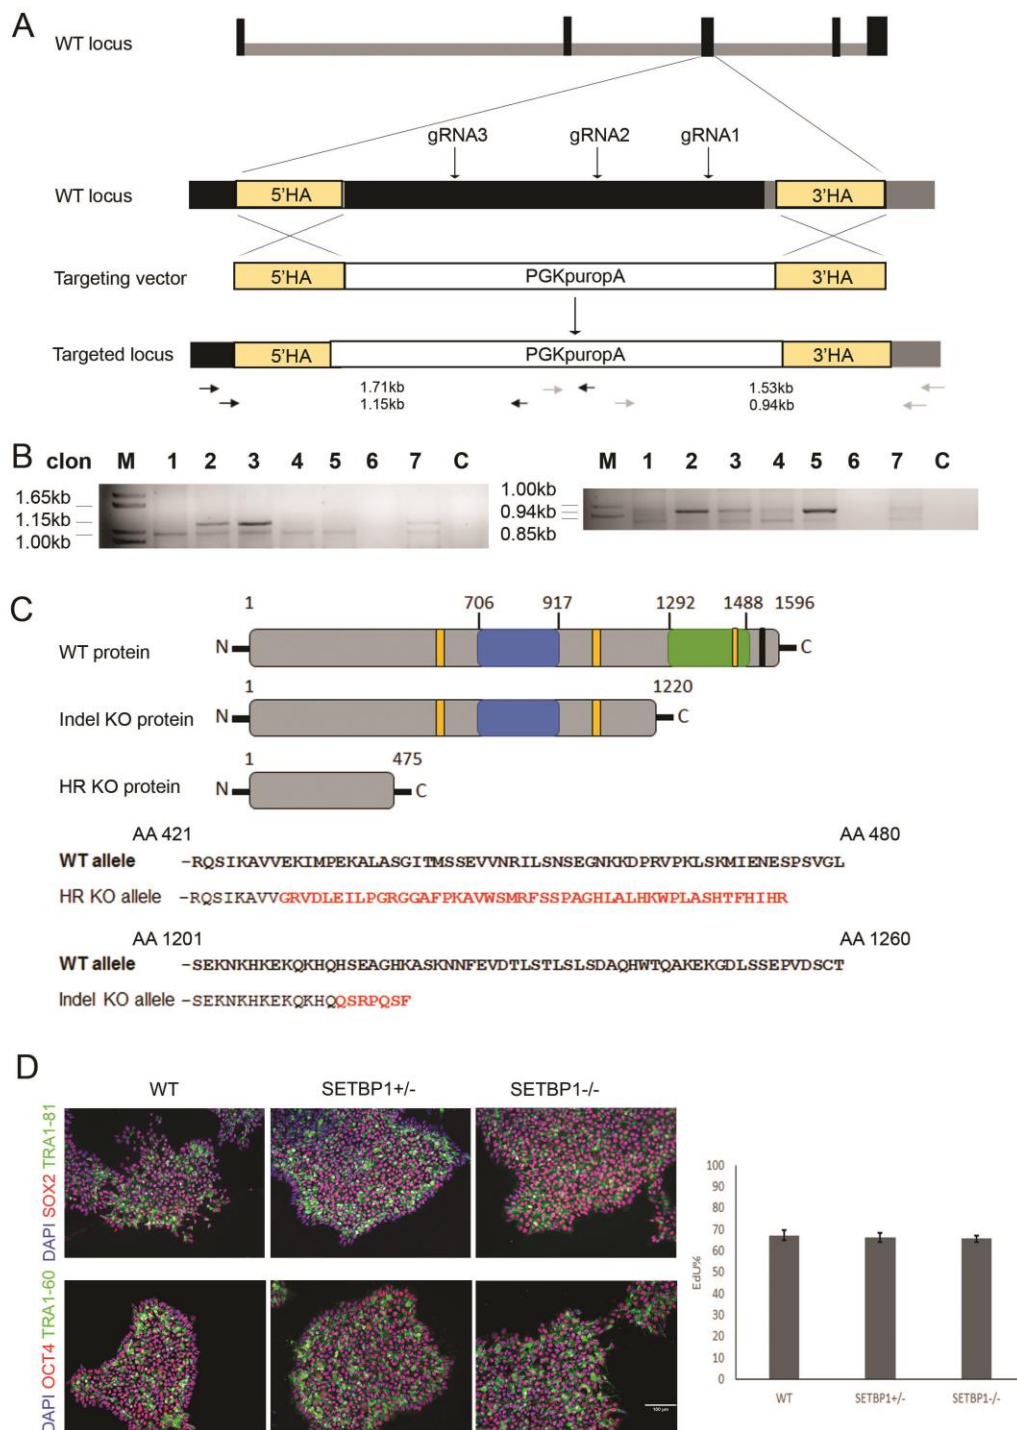

88

89 **Fig. 1. Generation of the SETBP1-deficient hESC lines.** (A) Schematic illustration of the wild type (WT)  
 90 *SETBP1* locus and targeting strategy. Exons are shown in black and introns in grey. The three gRNAs targeting  
 91 exon 4 are indicated in arrows. The homologous arms (HA) corresponding to exon 4 and part of intron 4/5 are  
 92 indicated in yellow, which are flanked by a PGKpuropA selection cassette in the targeting vector. The positions

93 of the two nested PCR primer pairs for screening homologous recombination (HR) at the 5' and 3' are indicated  
94 in black and grey arrows, respectively. **(B)** Agarose gels showing the PCR amplicon from the targeted clones  
95 (lanes 2, 3, 7). **(C)** SETBP1 protein aligned with predicted mutant SETBP1 proteins for HR  $-/-$  (475AA) and indel  
96  $-/-$  (1220AA) alleles, respectively. yellow=AT hook domains, blue=SKI homologous region, green=SET binding  
97 domain, black=repeat domain. Amino acid sequence alignment of WT SETBP1 protein vs HR  $-/-$  allele and indel  
98  $-/-$  allele are shown. Amino acids in red indicate the sequence different from the WT prior to the stop codon. **(D)**  
99 Representative immunostaining of WT, *SETBP1* $+/-$  and *SETBP1* $-/-$  clones for pluripotency markers SOX2 (red),  
100 TRA1-81 (green) and OCT3/4 (red) with DAPI counterstain. Bar graph shows the proportion of EdU<sup>+</sup> in WT,  
101 *SETBP1* $+/-$  and *SETBP1* $-/-$  hESCs ( $P>0.05$ ). Data presented as mean  $\pm$  s.e.m of two independent experiments.  
102 AA: amino acid; N: NH<sub>2</sub> terminal; C:COOH terminal. Scale bar: 50uM.

103

#### 104 **Loss of SETBP1 affects neural rosette size without compromising neural induction**

105 SETBP1 is expressed in the ventricular zone of the developing mouse telencephalon  
106 (<http://www.eurexpress.org>) and highly expressed in human neocortex (<http://hbatlas.org>).  
107 Cortical differentiation was therefore chosen for investigating SETBP1 function. The SETBP1  
108 deficient and isogenic control hESCs were induced to differentiate towards forebrain fate using  
109 a modified dual SMAD inhibition protocol as described previously (Fig. 2A)(24, 25).  
110 Efficiency of cortical fate commitment was analysed by antibody staining for pan neural stem  
111 cell markers (SOX2, NESTIN) and the forebrain and dorsal NPC markers (FOXP1, PAX6 and  
112 OTX2) at day 18-20 (Fig. S2A-B). The vast majority of cells, stained positive for PAX6,  
113 OTX2, SOX2 and NESTIN and the numbers of positive cells were comparable between the  
114 three genotypes, with the exception of FOXP1 that exhibited a 50% reduction in the SETBP1-  
115  $-/-$  cultures in comparison with WT levels. Marker expression at the protein level was supported  
116 by RT-PCR analysis, which revealed a rapid exit of the pluripotent state as demonstrated by  
117 downregulation of *OCT4* and *NANOG* and concurrent induction of *SOX1*, *SOX2*, *NESTIN*,  
118 *PAX6*, *OTX2*, and additional dorsal NPC gene markers *EMX2* and *GLI3* in a similar temporal  
119 pattern between genotypes. Consistent with immunostaining, we detected a decreased level of

120 *FOXP1* and *SIX3* in SETBP1<sup>-/-</sup> cultures compared to the WT (Fig. S3A). Non-cortical  
121 transcripts such as *PAX7* (dorsal midbrain/spinal cord) and *NKX2.1* (ventral forebrain) were  
122 detected at very low levels in both control and SETBP1<sup>-/-</sup> cultures ( $2^{-\Delta\Delta CT} > 30$ , data not  
123 shown). These observations suggest that neural induction and cortical fate specification  
124 occurred normally in the absence of SETBP1.

125 However, SETBP1<sup>-/-</sup> NPCs formed larger neural rosettes than that of the SETBP1<sup>+/-</sup> and WT  
126 cells (Fig. 2B). Neural rosettes are radial arrangements of polarized NPCs formed at around  
127 two-three weeks of hESC differentiation. Apart from the increased size ( $p=0.005$  for rosettes  
128 area and  $p=0.025$  for rosettes perimeter), SETBP1<sup>-/-</sup> rosettes, as visualised by N-CAD antibody  
129 staining, appear otherwise normal in terms of the shape and cellular organization.

### 130 **Cortical neuronal differentiation is altered in SETBP1-deficient NPCs**

131 During development, corticogenesis is tightly regulated to ensure the generation of correct  
132 numbers of neurons in time and space. Neurons in different cortical layers are generated in an  
133 inside-out fashion, with neurons in the deep layers born first and upper layer neurons later(26,  
134 27). Cortical differentiation of hESCs in vitro recapitulates the temporal aspects of this  
135 process(28, 29). We therefore performed immunostaining for two deep layer markers TBR1  
136 (layer VI) and CTIP2 (BCL11B, layers V-VI) and an upper layer marker SATB2 (layers II and  
137 III) at day 30, 40 and 50, a time window that these neurons are being produced in the control  
138 cultures. We observed a decreased production of CTIP2<sup>+</sup> cells in SETBP1<sup>-/-</sup> cultures compared  
139 to the WT controls at all time points (ANOVA day 30  $P=0.030$ , day 40  $P=0.037$ , day 50  
140  $P=0.214$ ) (Fig. 2C and Fig. 2D). A reduction in CTIP2<sup>+</sup> cells were also observed in SETBP1<sup>+/-</sup>  
141 cultures although statistics significance was only reached at day 40. Intriguingly, the opposite  
142 trend was observed for TBR1<sup>+</sup> neurons that were over-represented in the SETBP1<sup>-/-</sup> cultures,  
143 although statistics significance was not reached (Fig. 2C, Fig. 2D and Fig. S3B). Consistent



144 with being late born cells, SATB2<sup>+</sup> neurons were not detected at day 30 and were very low in  
145 number even at day 40 and 50 (~2%) in all cultures (Fig. 2C and Fig. 2D).

146 To investigate whether the observed differences in TBR1<sup>+</sup> and CTIP2<sup>+</sup> cells in SETBP1 mutant  
147 cultures was caused by a decrease in general neuronal production, we determined the total  
148 number of NPCs by immunostaining for PAX6 and NeuN neuronal marker at day 30, 40 and  
149 50 (Fig. S4A and Fig. S4B). At all three time points SETBP1<sup>-/-</sup> cultures had a lower number  
150 of NeuN<sup>+</sup> cells than the controls. Lower number of NeuN<sup>+</sup> cells were also detected in  
151 SETBP1<sup>+/-</sup> cultures although no statistic differences. In contrast, while a large proportion of  
152 the WT cells no longer expressed progenitor marker PAX6 at day 40 (17% PAX6<sup>+</sup> cells),  
153 around 45% cells in the SETBP1<sup>-/-</sup> cultures remained PAX6<sup>+</sup> (Fig. S4A and Fig. S4B).  
154 Together, these findings demonstrate a distorted production of deep layer cortical neurons and  
155 an overall decrease in neuronal differentiation of cortical NPCs in SETBP1<sup>-/-</sup> cultures, while  
156 heterozygous deletion of SETBP1 had a milder effect on cortical differentiation in our model.

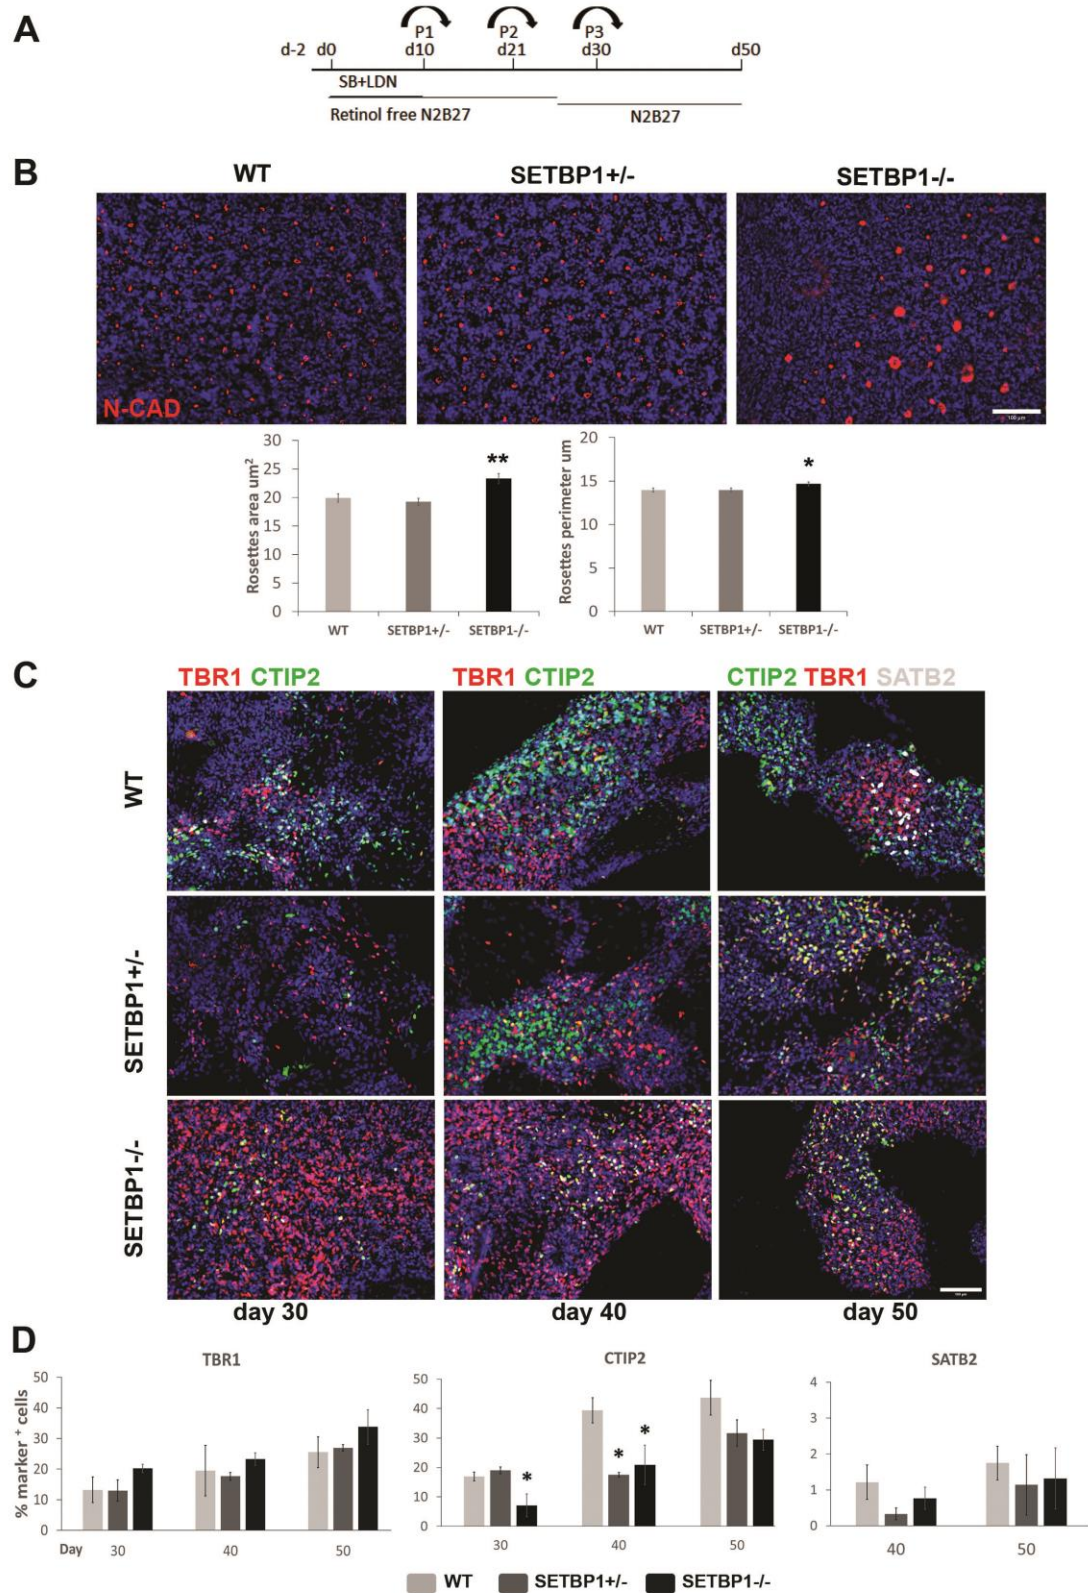

157

158 **Fig. 2. Cortical neuronal differentiation is impaired in SETBP1-deficient NPCs.** (A) Schematic representation

159 of hESC cortical differentiation protocol. (B) Day 18/20 cultures were immunostained for N-cadherin (red) and

160 DAPI (blue) showing the organization and size of the neural rosettes. Graphs showing quantitative measurements  
161 for rosette apical area and perimeter (in  $\mu\text{M}$ ) of a minimum of 900 rosettes per cell line (WT, HET1, HET2, KO1  
162 and KO2) and  $\geq 3000$  rosettes per genotype WT, SETBP1<sup>+/-</sup> and SETBP1<sup>-/-</sup> (Mann-Whitney U test  $P=0.005$  for  
163 rosettes area and  $P=0.025$  for rosettes perimeter). (C) Immunostaining of cortical layer markers TBR1 (layer VI)  
164 and CTIP2 (layers V-VI) days 30, 40 and 50, respectively, and SATB2 (layers II-III) at day 50. Images  
165 representative of several independent experiments for each genotype (D) Quantitative analysis of the above. Data  
166 presented as mean  $\pm$  s.e.m for each genotype with a minimum of two independent experiments carried out per line  
167 (WT = 5, HET1 and HET2 = 2, KO1 = 3, KO2 and KO3 = 2). One-way ANOVA test, Bonferroni Post Hoc (\*  
168  $p \leq 0.05$ , \*\*  $p \leq 0.01$ , \*\*\*  $p \leq 0.001$ ). Scale bar: 100 $\mu\text{M}$ .

169

### 170 **SETBP1 deficiency results in increased cortical progenitor proliferation**

171 The reduction of SETBP1<sup>-/-</sup> neurons could be due to an imbalance between NPC proliferation  
172 versus terminal differentiation. We therefore investigated a potential change in cell cycle of  
173 SETBP1<sup>-/-</sup> NPCs by EdU and Ki67 double labelling at day 34 (Fig. 3A-C). EdU is a thymidine  
174 analogue hence its incorporation marks cells in the S phase, while Ki67 is a protein present  
175 during all active phases of the cell cycle (G1, S, G2 and mitosis). The SETBP1<sup>+/-</sup> and WT  
176 cultures contained a similar number of EdU<sup>+</sup> and Ki67<sup>+</sup> cells ( $14.24 \pm 1.10\%$  vs  $11.42 \pm 0.11$   
177 % and  $19.94 \pm 1.21\%$  vs  $18.52 \pm 0.93\%$ , respectively). However, significantly more EdU<sup>+</sup>  
178 ( $28.27 \pm 0.22\%$ ), Ki67<sup>+</sup> ( $25.45 \pm 1.14\%$ ) and EdU<sup>+</sup>Ki67<sup>+</sup> cells ( $18.28 \pm 0.56\%$  vs  $12.3 \pm$   
179  $1.7\%$ ) were detected in the SETBP1<sup>-/-</sup> cultures (Fig. 3A-B). The fraction of EdU<sup>+</sup>Ki67<sup>-</sup> cells  
180 within the EdU<sup>+</sup> population is often used as an index for cell cycle exit(30), we found that the  
181 ratio of EdU<sup>+</sup>Ki67<sup>-</sup>/ EdU<sup>+</sup> is lower in SETBP1<sup>-/-</sup> cultures than the SETBP1<sup>+/-</sup> and WT controls  
182 with a borderline p-value ( $P=0.055$ ) (Fig. 3C), suggesting that SETBP1-deficient NPCs were  
183 slow in exiting the cell cycle compared to their isogenic counterparts. The ratio of EdU<sup>+</sup>Ki67<sup>+</sup>/  
184 Ki67<sup>+</sup> is inversely related to the length of cell cycle(31). Consistent with an increase in  
185 proliferation, this ratio was slightly higher in SETBP1<sup>-/-</sup> cultures than the controls, indicating  
186 the former have shorter cell cycle (Fig. 3C). To gain further insight into changes in cell cycle

187 profile, we performed a flow cytometry based cell cycle analysis (Fig. 3D). This assay  
188 identifies cells in three major phases of the cell cycle (G0/1, S and G2/M) based on their DNA  
189 content. Since the cellular defects observed were largely limited to the SETBP1<sup>-/-</sup> cultures, we  
190 focused on this genotype in the subsequent studies. Compared to the WT control, the SETBP1-  
191 <sup>-/-</sup> cultures contained a higher percentage of cells in S ( $9.24 \pm 0.69\%$  vs  $7.92 \pm 1.52\%$ ) and  
192 G2/M phases ( $19.81 \pm 0.18\%$  vs  $18.07 \pm 0.37\%$ ,  $P=0.029$ ) and fewer cells in G0/G1 ( $68.01 \pm$   
193  $0.31\%$  vs  $70.24 \pm 1.29\%$ ). We also determined the number of cells in mitosis by antibody  
194 staining for phosphorylated histone H3 (PH3), no difference was observed between the  
195 SETBP1<sup>-/-</sup> and control cultures (Fig. 3A).

196 To investigate how altered cell cycle impact on the growth rate over time, we compared  
197 population growth of SETBP1<sup>-/-</sup> and WT cultures between day 19 and day 45. Consistent with  
198 EdU incorporation and cell cycle analysis, more cells were found in the SETBP1<sup>-/-</sup> cultures  
199 than the WT from day 30 onwards ( $P \leq 0.05$ , Fig. 3E). Together, these findings demonstrate that  
200 SETBP1 deficiency lead to enhanced NPC division by regulating cell cycle.

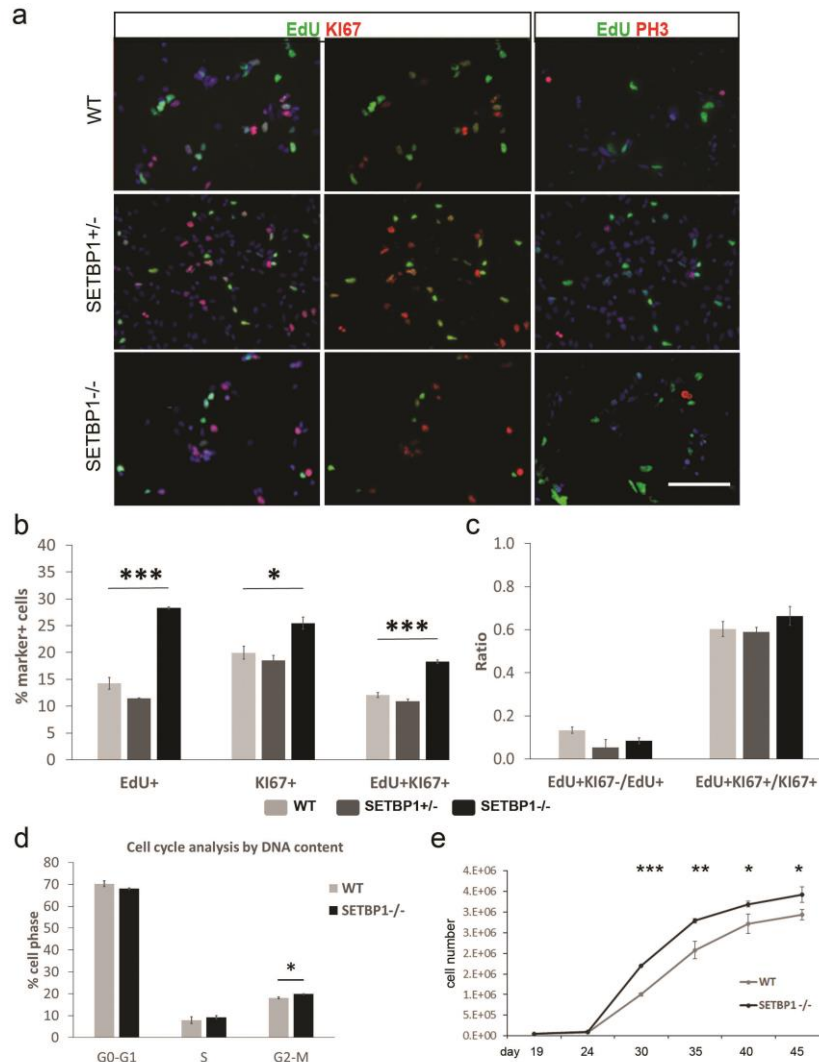

201

202 **Fig. 3. SETBP1 deficiency enhances cortical progenitor proliferation.** (A) WT, SETBP1+/- (HET1) and  
 203 SETBP1-/- (KO1) day 35 cultures were immunostained for EdU (green), Ki67 (red), PH3 (red) and counterstained  
 204 with DAPI (blue). (B) Percentage of cells positive for EdU ( $P \leq 0.001$ ), Ki67 ( $P = 0.016$ ) and EdU and Ki67 (cell  
 205 cycle re-entry  $P \leq 0.001$ ). (C) Ratios of cell cycle exit and cell cycle length ( $P = 0.055$ ,  $0.043$ ). Data presented as  
 206 mean  $\pm$  s.e.m from 3 independent wells with 6 random fields each. One-way ANOVA test (\*  $p \leq 0.05$ , \*\*  $p \leq 0.01$ ,  
 207 \*\*\*  $p \leq 0.001$ ). Scale bar: 100uM. (D) Cell cycle analysis by DNA content using Flow cytometry, % of cells in  
 208 each of the cell cycle phases. Data presented as mean  $\pm$  s.e.m of 2 independent experiments in triplicates. Student's  
 209 T test, one tail (G1-G0  $P = 0.118$ , S  $P = 0.255$ , G2-M  $P = 0.029$ ). (E) Growth curve analysis from day 19 to day 45  
 210 showing the increased population growth of the SETBP1-/- (KO1) NPCs compared to the isogenic controls.  
 211 Statistical significant differences were found from day 30 onwards (Student's T test,  $P = 6.71E-05$  for day 30,  $0.015$   
 212 for day 35,  $0.033$  for day 40, and  $0.050$  for day 45). Data presented as mean  $\pm$  s.e.m from 3 independent wells with  
 213 two technical measurements.

214 **Genome-wide transcriptome analysis identified Wnt/ $\beta$ -catenin signaling as a target of**  
215 **SETBP1 function**

216 To gain further insight into the molecular mechanisms underlying prolonged proliferation  
217 window of SETBP1-deficient NPCs, we performed a genome wide transcriptome analysis of  
218 neural cells derived from the SETBP1<sup>-/-</sup> and isogenic WT control lines by RNA sequencing  
219 (RNAseq). To cover all stages of cellular abnormality, samples were collected from day 15 and  
220 day 21 (early and peak neural rosette stage, respectively) and day 34, when abnormal NPC  
221 division and neurogenesis was becoming evident. Principle Component Analysis (PCA)  
222 showed that 100% of the variance is attributed to SETBP1 genotypes, while the biological  
223 replicates within SETBP1<sup>-/-</sup> or the control samples exhibit 0% variance statistically (Fig. 4A).  
224 At a significant level of adjusted  $P \leq 0.1$ , we identified 6060, 9997 and 17654 differentially  
225 expressed transcripts at the three analysed time points, respectively (Fig. 4B). Amongst the top  
226 differentially expressed genes, *FOXG1* was down regulated at day 15 and 21 (Fig. 4C-D),  
227 providing independent support of the previous observations by immunostaining (Fig. S2A-B)  
228 and RT-PCR (Fig. S3A). Other top down-regulated transcripts were several cortical  
229 transcription factors such as *LHX2*, *DMRTA2*, *SIX3*, *PAX6* and *EMX1*, with the changes most  
230 evident at day 15 and some recovery of transcription levels at day 21 (Fig. 4C-D). On the other  
231 hand, some cortical transcription factors such as *NESTIN*, *SOX1*, *HES1*, *EMX2* and *OTX1/2*  
232 were up-regulated in the SETBP1-deficient NPCs at one or both of time points (Fig. 4C-D).  
233 No changes in expression level were observed for ventral telencephalic determinants such as  
234 *NKX2.1*, *GSX2* and *LHX6*, although these transcripts were present at very low abundance. At  
235 day 34, basal progenitor (*TBR2*), pan neuronal (*TUBB3*, *MAP2*) and cortical layers specific  
236 marker genes (*TBR1*, *CTIP2/BCL11B*, *CUX1/2*, *SATB2*, *RELN*) were found down-regulated in  
237 the SETBP1-deficient cultures. In contrast, *NESTIN* was 2-fold higher in the SETBP1<sup>-/-</sup>  
238 samples than the controls (Fig. 4E). These findings support the observed NPC SETBP1-



239 deficient phenotype and demonstrate a further role for SETBP1 in cortical NPC proliferation  
240 and neurogenesis.

241 Using DAVID 6.8 gene functional classification tool (<https://david.ncifcrf.gov/>) on the top 1000  
242 differentially expressed protein coding genes, we identified that top enriched gene ontology  
243 (GO) terms concerned mainly biological processes such as regulation of transcription, cell  
244 adhesion and extracellular matrix organization. KEGG (Kyoto Encyclopedia of Genes and  
245 Genomes) pathway analysis revealed DNA replication, Wnt, hippo, PI3K-Akt and ECM-  
246 receptor interaction signaling as the top enriched pathways up-regulated in SETBP1<sup>-/-</sup> cultures  
247 (Table S2-4). All these pathways are highly relevant to the regulation of NPCs proliferation  
248 and neurogenesis (32-36).

249 Wnt signaling is known to play an important role in cortical development. Altered Wnt pathway  
250 was identified at all three differentiation stages, with the biggest changes observed at day 21  
251 (FC 2.73, Padj=0.0029) and day 34 (FC 2.53, Padj=0.0014, Table S3-4). We therefore  
252 examined the gene set for genes involved in Wnt signaling (Fig. 4F-G and Figure S3).  
253 Strikingly, the majority of the WNT ligands, both canonical and non-canonical, were highly  
254 up-regulated in SETBP1-deficient cells, with FC varying from 2.5 to 73. Also up-regulated  
255 were the canonical WNT/ $\beta$ -catenin signaling responsive genes *C-MYC* (4.8x), *CYCLIND1*  
256 (*CCND1*, 2x) and *AXIN2* (4.7x, Fig. 4F). In contrast, genes involved in  $\beta$ -catenin degradation  
257 complex (*GSK3 $\beta$* , *CSNK*, *AXIN1/2*, *APC*) were mostly down-regulated (Fig. S5).

258 To ascertain that WNT/ $\beta$ -catenin signaling is indeed elevated in SETBP1-deficient NPCs at  
259 the protein level, we determined the level of  $\beta$ -catenin and WNT co-receptor LRP6 in day 21,  
260 day 30 and day 40 neural cultures by Western blot. Activation of the canonical WNT signaling  
261 results in N-terminal phosphorylation of  $\beta$ -catenin by GSK3 $\beta$ , leading to degradation of  $\beta$ -  
262 catenin(37, 38). We found that the level of total  $\beta$ -catenin was significantly higher in SETBP1-

263 *-/-* cultures than the controls at day 30 ( $P=0.031$ ), although no differences were found at day 21  
264 and 40. It has been reported previously that C-terminal phosphorylation of  $\beta$ -catenin in serine  
265 552 and serine 675 (p-S552 and p-S675) by AKT and PKA can enhance  $\beta$ -catenin/TCF reporter  
266 activation(39, 40). We detected an average of 2.5-fold increase of p-S552 ( $p=0.00024$ ) and 1.5  
267 fold increase of p-S675 ( $p=0.019$ ) in SETBP1 $-/-$  cultures than the controls at day 30 (Fig. 4H-  
268 I).

269 Another key phosphorylation event in the activation of the WNT signaling cascade is the  
270 phosphorylation of the LRP5 and LRP6 co-receptors(41, 42), LRP6 is known to play a more  
271 dominant role during embryogenesis. We observed a near 2-fold increase of phosphorylated  
272 LRP6 (p-LRP6) in day 30 SETBP1 $-/-$  NPCs than the isogenic control cells ( $p=0.046$ , Fig. 4H-  
273 I). Together, these studies validated the increase of Wnt/ $\beta$ -catenin activation in SETBP1-  
274 deficient cells and provide the first demonstration of a regulatory role for SETBP1 in canonical  
275 WNT signaling in cortical NPCs.



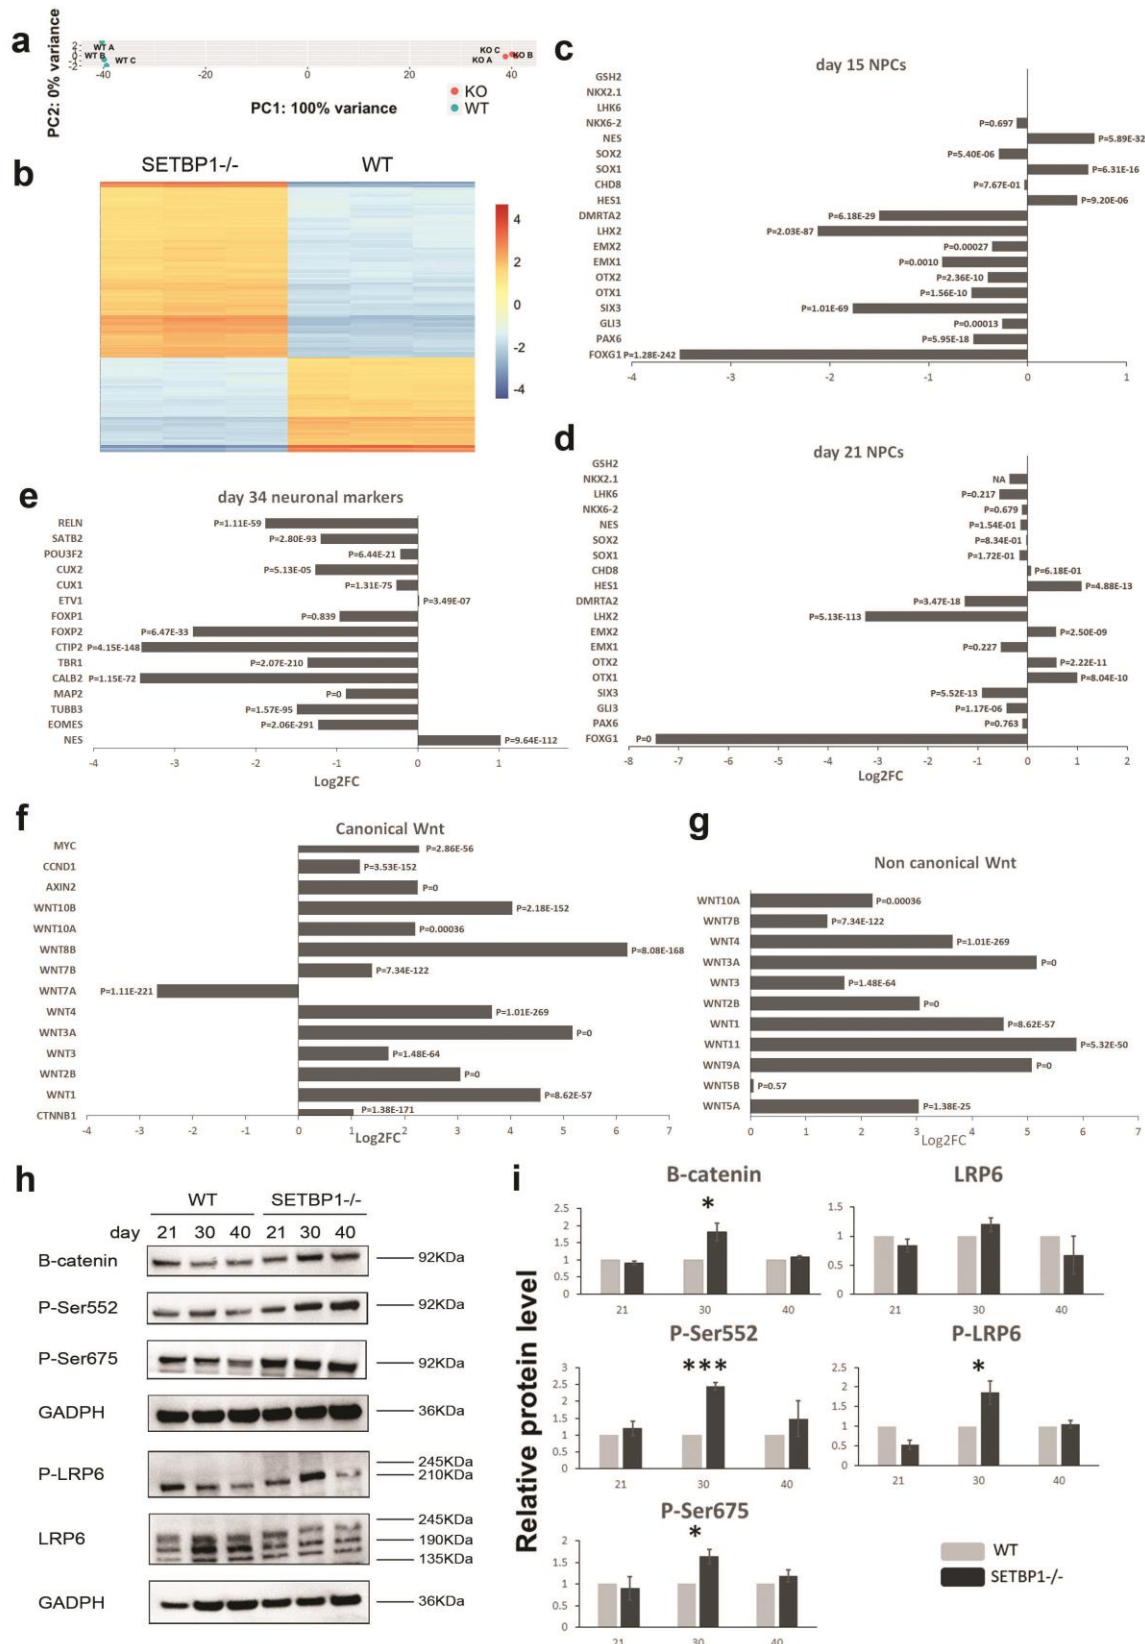

276

277 **Fig. 4. Genome wide transcriptome profiling revealed SETBP1 regulation of WNT signaling.** (A) Principle  
 278 component analysis (PCA) of the samples. (B) Heatmap depicting 17654 differentially expressed transcripts at

279 day 34 ( $p_{adj} \leq 0.1$ ). **(C-E)** Example of differentially expressed genes associated with telencephalic patterning at  
280 day 15, day 21 and neuron genes at day 34, respectively. **(F-G)** Differentially expressed genes associated with  
281 canonical non-canonical Wnt pathway at day 34. **(H)** Representative images of Western blot analysis for WNT  
282 signaling proteins for WT and SETBP1<sup>-/-</sup> (KO1). **(I)** Relative protein level of  $\beta$ -catenin,  $\beta$ -catenin p-S552 and p-  
283 S675, and LRP6 co-receptor and p-LRP6 at day 21, 30 and 40 relative to WT basal levels. Data from 3 independent  
284 differentiations analysed in duplicates or triplicates. Student's T test was used to compare the expression between  
285 the two lines. (\*  $p \leq 0.05$ , \*\* $p \leq 0.01$ , \*\*\* $p \leq 0.001$ ).

286

### 287 **Pharmacological inhibition of Wnt/ $\beta$ -catenin pathway rescues proliferation defect of** 288 **SETBP1<sup>-/-</sup> NPCs**

289 To establish a causal relationship between the increased Wnt/ $\beta$ -catenin signaling and over  
290 proliferation of SETBP1-deficient NPCs, we interrogated Wnt signaling using XAV939  
291 (XAV), a small molecule tankyrase inhibitor that stabilizes Axin and stimulates  $\beta$ -catenin  
292 degradation(43). SETBP1<sup>-/-</sup>, SETBP1<sup>+/-</sup> and WT NPC cultures were exposed to XAV for 10  
293 days from day 11, a time window prior to the phenotypic manifestation (Fig. 5A and Figure  
294 S6A). Wnt signaling inhibition by XAV was verified by evident reduction in total  $\beta$ -catenin,  
295 p-S552/p-S675 as well as p-LRP6 comparing treated SETBP1<sup>-/-</sup> with respective to the no XAV  
296 sister cultures in both WT and SETBP1<sup>-/-</sup> cultures (Fig. 5B). Importantly, after XAV treatment,  
297 total  $\beta$ -catenin, p-S552 and p-S675 in SETBP1<sup>-/-</sup> cells were no longer different to the isogenic  
298 control cells without XAV treatment. As a control for inhibitor specificity, the levels of the  
299 GAPDH were not affected by XAV treatment.

300 The effect on XAV treatment in NPCs proliferation was examined via cell cycle analysis of  
301 DNA content (Fig. 5C). An increase of cells in G1 phase and a decrease of cells in G2-M was  
302 observed for both SETBP1<sup>-/-</sup> and control NPCs. In XAV treated SETBP1<sup>-/-</sup> cultures, the  
303 number of cells in G2-M phase was restored to a level similar to those in the WT cultures with  
304 or without XAV ( $15.18 \pm 0.51$  and  $15.02 \pm 1.07$ ,  $P=0.902$ ). We next examined the effect of

305 XAV on NPC and neuronal numbers at day 30, 40 and 50 (Fig. 5D and Fig. S6B). Compared  
306 to non-treated SETBP1<sup>-/-</sup> cultures, cells in XAV treated cultures exhibited pronounced  
307 neuronal arborisation similarly to those in the WT control cultures without XAV (Fig. 5D and  
308 Fig. S6B). Immunostaining revealed that, as expected, XAV treatment in the WT cultures  
309 accelerated neuronal differentiation as demonstrated by a reduced number of PAX6<sup>+</sup> and  
310 NESTIN<sup>+</sup> cells and concurrent increase of NeuN<sup>+</sup> and MAP2<sup>+</sup> cells in comparison to no XAV  
311 sister control cultures (Fig. 5D and Fig. S6B). XAV treatment also resulted in a significant  
312 increase in CTIP2<sup>+</sup> cells and was accompanied by a reduction in TBR1<sup>+</sup> cells from day 30  
313 onwards and higher detection of SATB2<sup>+</sup> cells (Fig. 5D and Fig. S6B).

314 Together, our data demonstrates that inhibition of WNT/ $\beta$ -catenin signaling can restore the  
315 proliferation and neurogenesis defects of SETBP1<sup>-/-</sup> NPCs and thus provide a functional  
316 verification that SETBP1 is playing a role in WNT signaling.

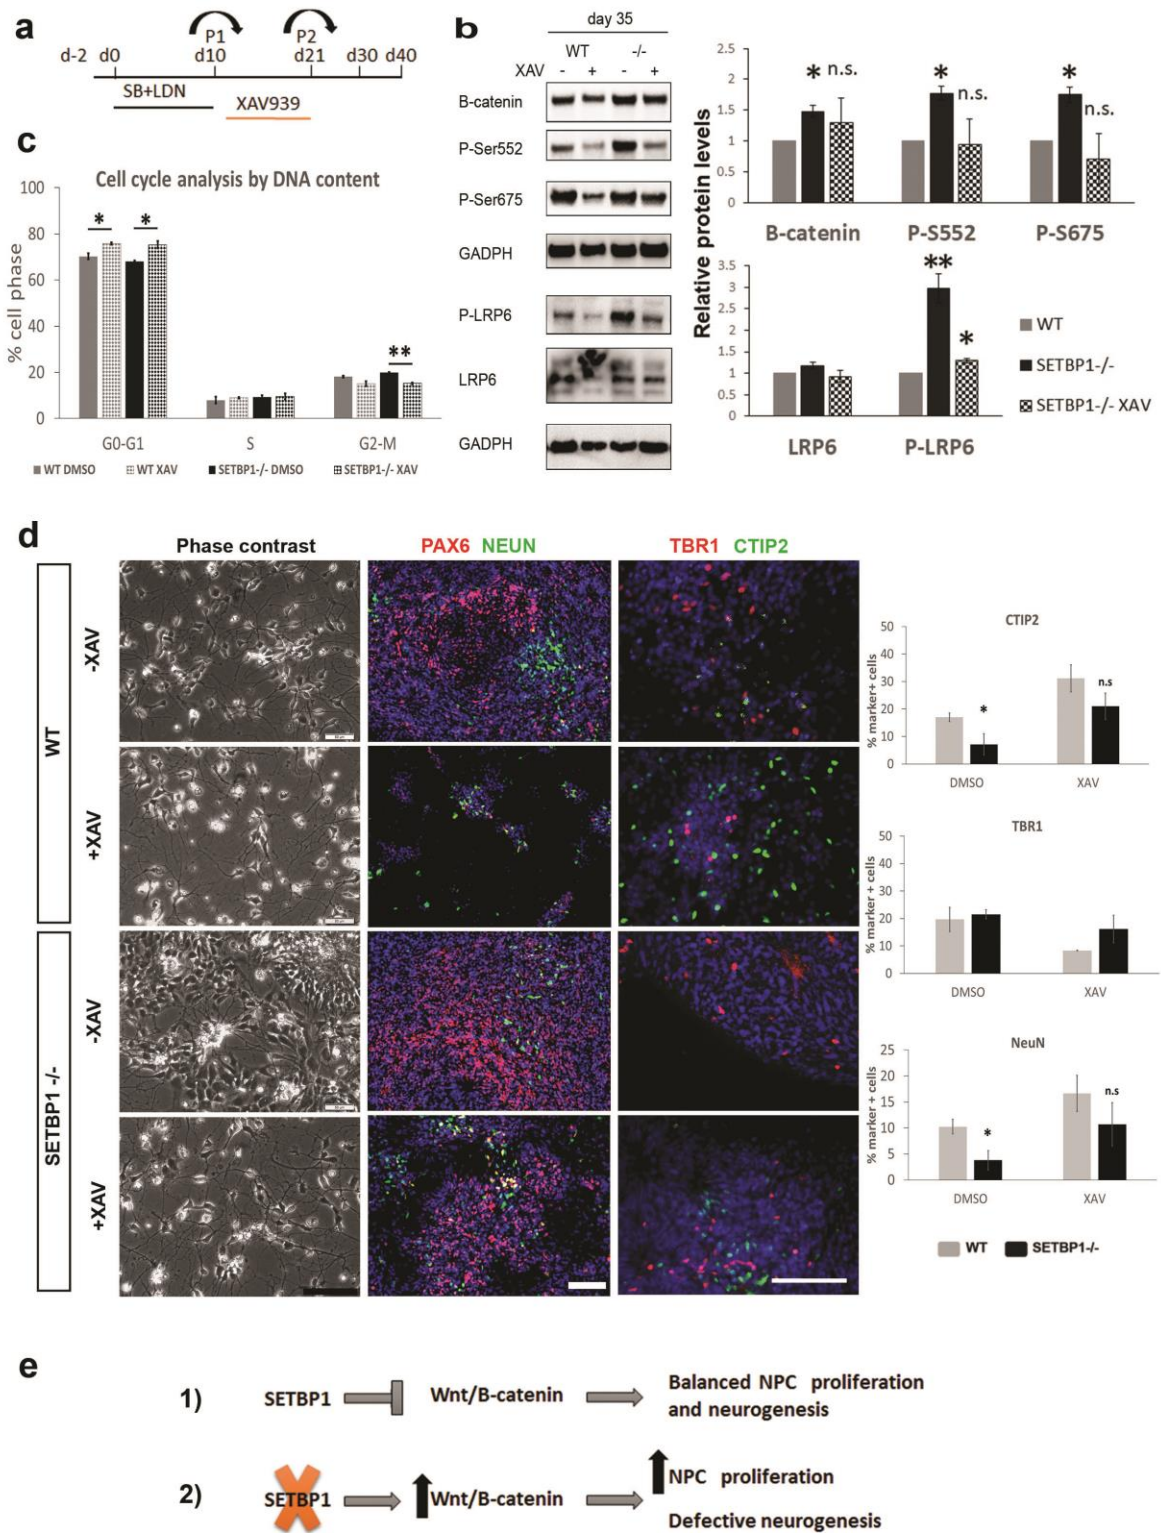

317

318 **Fig. 5. Functional interrogation of WNT signaling with XAV939 treatment. (A)** Experimental scheme.

319 Differentiation cultures under basal condition (control) or exposed to XAV939 2uM from day 11 to day 21. **(B)**

320 Western blot analysis for the effects of XAV treatment on WNT signaling. SETBP1<sup>-/-</sup> (KO1) protein levels after  
321 XAV treatment at day 35 relative to WT basal levels. Data from 2 independent differentiations analysed in  
322 duplicates or triplicates. Student's T test was used to compare the expression between the two lines,  $\beta$ -catenin  
323 basal P=0.033, XAV P=0.542, S552 basal P=0.023, XAV P=0.906, S674 basal P=0.024, XAV P=0.554, LRP6  
324 basal P=0.153, XAV P=0.644, P-LRP6 basal P=0.004, XAV P=0.012. (C) Analysis of the effect of XAV  
325 treatment on the proportion of cells in each of the cell cycle phases at day 35. Data presented as mean  $\pm$  s.e.m of  
326 2 independent experiments in triplicates. Student's T test, one tail, was used to compare the expression between  
327 the two lines and the two conditions (WT basal vs XAV G0-G1 P=0.029, S P $\geq$ 0.05, G2-M P $\geq$ 0.05, SETBP1<sup>-/-</sup>  
328 basal vs XAV G0-G1 P=0.021, S P $\geq$ 0.05, G2-M P=0.0045). (D) Phase contrast and immunofluorescence images  
329 of cultures in basal or XAV treated conditions at day 30. Cell nuclei were labelled by DAPI. Scale bar: 100uM.  
330 Bar- graphs showing quantification of CTIP2, TBR1 and NeuN positive neurons. Student's T test was used to  
331 compare the expression between the two lines, CTIP2<sup>+</sup> cells: basal P=0.029, XAV P=0.214; TBR1<sup>+</sup> cells: basal  
332 P=0.672 XAV P=0.258, NeuN<sup>+</sup> cells: basal P=0.038, XAV P=0.333 (E) Schematic illustration depicting the role  
333 of SETBP1 in regulating NPC proliferation and neurogenesis. 1) In normal conditions, adequate level of Wnt/ $\beta$ -  
334 catenin signaling is modulated by SETBP1 to ensure a balanced NPC proliferation and neurogenesis. 2) Loss of  
335 SETBP1 leads to elevated Wnt/ $\beta$ -catenin signaling leading to excessive NPC expansion and defective  
336 neurogenesis.  
337 (Student's T test \* p  $\leq$  0.05, \*\*p  $\leq$  0.01, \*\*\*p  $\leq$  0.001).

338

## 339 DISCUSSION

340 The generation of neurons in the cortex is tightly regulated temporally and spatially with a  
341 progressive temporal restriction in progenitor potential. During the course of cortical  
342 development, NPCs firstly reproduce themselves to expand the population of progenitors via  
343 symmetric or proliferative cell divisions(44, 45). Later, cell division pattern changes to  
344 asymmetric neurogenic divisions that generates an NPC that re-enters the cell cycle and a  
345 postmitotic neuron, or symmetric neurogenic divisions that yield two neurons(26, 46). Defects  
346 in this process can lead to a wide range of brain malformations such as micro- or macrocephaly.



347 Using genome edited hESC and in vitro cortical differentiation as an experimental model, we  
348 report here that loss of SETBP1 resulted in protracted NPC proliferation and defective  
349 neurogenesis, thus identifying SETBP1 as an important regulator governing the delicate  
350 balance between NPC expansion and terminal differentiation. This newly discovered biological  
351 function of SETBP1 in human neural development is consistent with its high-level expression  
352 in the developing cortex and its evolutionary conservation.

353 Dysregulation of WNT signaling in SETBP1-deficient neuronal cultures presents another  
354 interesting new finding of this study. This regulatory relationship was demonstrated at both  
355 transcript and protein level with further support of functional interrogation and phenotypic  
356 rescue. WNT signaling is known to play an important role in cortical development. Elevated  
357 canonical WNT signaling by enforced expression of stabilized  $\beta$ -catenin promotes cell cycle  
358 re-entry of NPCs, leading to their excessive expansion in telencephalon(47). A prominent  
359 feature of our SETBP1-deficiency model is prolonged NPC proliferation, due to shortened cell-  
360 cycle length and reduced cell cycle exit rate. Therefore, the increased WNT signaling in  
361 SETBP1<sup>-/-</sup> cultures is likely a key contributor to the aberrant NPC proliferation.

362 Interestingly, dysregulated WNT signaling have been recently reported in a growing number  
363 of studies employing patient-derived iPSC or CRISPR/CAS9 edited hESC models of  
364 neurodevelopmental disorders that include schizophrenia, autism spectrum disorder (ASD) and  
365 intellectual disability(48-52). Elevated WNT signaling has been implicated as a cause of the  
366 macrocephaly observed in ASD patients(53). The current study suggests that increased WNT  
367 signaling may be also an underlying mechanism of the cognitive and motor impairment  
368 observed in patients with SETBP1 disorder.

369 SETBP1 is well known as an inhibitor of PP2A in acute myeloid leukemia (54). A transcription  
370 factor function was first described in murine myeloid progenitor cells through binding of  
371 Hoxa9/10 promoters(55). Using a similar model, the same group described that binding of

372 Setbp1 to Runx1 promoter caused a downregulation of RUNX1 expression (56). In a recent  
373 study, Piazza and colleagues show the ability of SETBP1 to bind to gDNA in AT-rich promoter  
374 regions triggering activation of gene expression via the recruitment of HCF1/KMT2A/PHF8  
375 epigenetic complex (57). They also described that in utero electroporation of SETBP1-G870S  
376 in the developing mouse brain caused an impairment in neurogenesis and delay in neuronal  
377 migration. A recent paper modelling SGS using iPSCs show that SGS NPCs present aberrant  
378 proliferation, DNA damage and dysregulated pathways related with cancer and apoptosis(58).  
379 However, these studies were carried mostly in myeloid progenitor cells or in SGS mutation  
380 related models that resemble SETBP1 gain of function. A role of SETBP1 directly regulating  
381 WNT signaling in the context of human brain has not yet been reported. While further  
382 investigation is needed to unravel the role of SETBP1 in WNT/ $\beta$ -catenin signaling in the  
383 context of cortical development, our work shows a new pathway to study in the context of  
384 SETBP1 haploinsufficiency and a possible therapeutic road to explore.

385 *FOXP1* is the most significantly down-regulated transcript in SETBP1<sup>-/-</sup> NPC cultures. Foxg1  
386 has been shown to suppress Wnt signaling in several mouse models(59, 60). Therefore, reduced  
387 FOXG1 may contribute to the elevated WNT activity in SETBP1-deficient cultures. SETBP1  
388 deficiency resulted in a significant reduction of CTIP2<sup>+</sup> cells and relatively higher numbers of  
389 TBR1<sup>+</sup> cells. Previous studies in rodents suggest that Foxg1 confers the competence of cortical  
390 progenitors for the characteristic ordered generation of layer-specific neuronal subtypes by  
391 coordinating Wnt and Shh signaling pathways in the telencephalon (61, 62). Therefore, we  
392 cannot exclude the possibility that the distorted neuronal production in our SETBP1<sup>-/-</sup> cultures  
393 may be attributed at least in part to FOXG1 hypo function. Our data opens new avenues to  
394 explore the functional link between FOXG1 and SETBP1 genes in the context of brain  
395 development.

396 Disturbed NPC proliferation and neuronal differentiation can lead to brain malformation as it  
397 happens in epilepsy with heteropia, ASD microcephaly or lissencephaly patients(4-7). Our  
398 finding of disturbed cortical progenitor proliferation and defective neurogenesis in SETBP1-/-  
399 model lend itself an invaluable tool to further investigate the aetiology of SETBP1 disorder  
400 and may contribute to the search of therapeutic compounds.

## 401 **MATERIALS AND METHODS**

### 402 **HESC culture and cortical neural differentiation**

403 HESCs (H7-WA07) and genome edited H7 derivatives were maintained on Matrigel-coated  
404 plates in Essential 8 media (TeSR-E8, Stemcell Technologies)(25). All hESCs were passaged  
405 via manual dissociation using Gentle Cell Dissociation Reagent (Stemcell Technologies). For  
406 differentiation, hESCs were pre-plated on growth factor-reduced matrigel in TeSR-E8. When  
407 cells reached >80% confluence, neural differentiation was initiated by switching TeSR-E8 to  
408 DMEM-F12/Neurobasal (2:1) supplemented with N2 and B27 (referred to thereafter as  
409 N2B27). For the first 10 days, cultures were supplemented with SB431542 (10 $\mu$ M, Tocris) and  
410 LDN-193189 (100nM, StemGene). Cultures were passaged using EDTA firstly on day 10 at a  
411 ratio of 1:2 onto fibronectin-coated plates. The second and third split were performed on day  
412 20-21 and day 30, respectively, onto poly-D-lysine/laminin coated 24-well plates at a density  
413 of 125.000 cells/well. Retinol-free B27 was used for the first 25 days, followed by normal B27  
414 from day 26 onwards. For Wnt/B-catenin inhibition, XAV939 (2 $\mu$ M, SelleckChem) was added  
415 to the media for 10 days after the second split.

### 416 **CRISPR/CAS9 genome editing**

417 Guide RNAs (gRNAs) were designed to target exon 4 of the human *SETBP1* gene using two  
418 independent CRISPR gRNA design tools: Atum CRISPR gRNA (former DNA2.0  
419 <https://www.atum.bio/eCommerce/cas9/input>) and the CRISPR Design Tool  
420 (<http://crispr.mit.edu>) to minimize the risk of off-target effects of Cas9 nuclease. gRNA1 5'-



421 TGTGGCCGGCTTCGCTGTGCTGG, gRNA2 5'-GGAGGTCATCGCGGTTTTGCAGG  
422 gRNA3 5'-TGAAATTTTCATCTCGCTCATGGG. All gRNAs were synthesized as  
423 oligonucleotides and cloned into the pSpCas9(BB)-2A-GFP plasmid (px458, Addgene)  
424 following the protocol of Ran et al(23). A donor template (gene targeting) vector for  
425 homologous recombination was constructed that contains a PGK-puro-pA selection cassette  
426 flanked by a 502 bp 5' homologous arm corresponding to part of exon 4 and 551 bp 3'  
427 homologous arm in intron 4/5. All three gRNA target sites are located within the 2705bp region  
428 between the two homologous arms (Figure 1). HESCs were transfected with a total of 4ug  
429 DNA in a ratio 2:3 (gRNAs:donor template) using the Amaxa P3 Primary Cell 4D-  
430 Nucleofector Kit (Lonza). Puromycin was added 3 days after electroporation at a concentration  
431 of 0.5ug/ml, drug resistant hESC colonies were picked one week later and expanded clonally.  
432 Genotyping was done by genomic PCR (primers used are provided in Table S1) followed by  
433 Sanger sequencing of candidate mutant PCR product. Only SETBP1 heterozygous lines were  
434 generated in the first round of transfection (Fig. 1B lanes 2, 3 and 7 for mutant clones confirmed  
435 with 5' and 3' PCRs). One of the heterozygous was used for a second round of targeting using  
436 the same gRNAs without the donor plasmid, which yield several clones carrying the original  
437 KO allele and a 5bp deletion in the other allele (Fig. S1B-C). Potential off-target effects were  
438 analyzed by genomic PCR followed by Sanger sequencing of the PCR product. No disruption  
439 of the WT sequence was detected for any of the tested cell lines (data not shown).

#### 440 **Karyotyping**

441 Sub-confluent hESCs cultures were treated with 0.1µg/ml Demecolcine (Sigma D1925) for 1  
442 hour at 37 °C and then dissociated to a single cell suspension using Accutase (ThermoFisher)  
443 for 10 minutes at 37 °C. Cells were collected and washed twice with PBS by centrifugation for  
444 4 min at 900 rpm. Cells were resuspended in 2 ml of PBS and 6 ml of 0.075 M KCl hypotonic  
445 solution was added to the tubes following incubation at 37 °C 15 min. Additional 4 ml of 0.075

446 KCl was added after incubation and cells were collected by centrifugation for 4 min at 900  
447 rpm. The supernatant was removed leaving 300 µl to resuspend the cell pellet by flicking. 4 ml  
448 of pre-chilled (-20 °C) methanol/acetic acid (3:1, VWR chemicals) was added dropwise and  
449 flicking to homogenize. Cell suspension was incubated for 30 min at room temperature. Cells  
450 were then centrifuged for 4 minutes at 900 rpm and resuspended with additional 4 ml of  
451 methanol/acetic acid. Cells were collected as previously and resuspended in 300 µl of  
452 methanol/acetic acid. Cell suspension was dropped onto a slide (pre-chilled and laid on angle)  
453 from a height of around 30 cm. Slides were air dried and chromosome spread was stained and  
454 mounted using a mix of mounting media with DAPI (1:3000). Images of chromosome spreads  
455 were obtained with an inverted microscope. Images were acquired at 100x using the Leica  
456 Application Suite software and manually counted on ImageJ.

#### 457 **Immunocytochemistry and EdU-labelling**

458 Cultures were fixed with 4% (w/v) paraformaldehyde and permeabilised with 0.1% (v/v) Triton  
459 X-100 in PBS. Following blocking with 1% (w/v) bovine serum albumin and 3% (v/v) donkey  
460 serum, cells were incubated with primary antibodies overnight at 4°C. After three washes with  
461 PBS, cells were incubated with complementary Alexa Fluor-conjugated antibodies and  
462 counterstained with DAPI. All antibodies were diluted in PBS-T 1% donkey serum and  
463 incubated overnight at 4 degrees. Secondary antibodies were diluted (1:1000, Life  
464 technologies) in PBS-T 1% donkey serum and incubated for 1 h at room temperature. The  
465 primary antibodies used are: Goat anti-OCT4, 1/500 (Santa Cruz), Goat anti-SOX2, 1/200  
466 (Santa Cruz), Mouse anti-TRA1-60 and Mouse anti-TRA1-81 1/200 (both Millipore), Mouse  
467 anti-PAX6, 1/1000 (DHSB), Rabbit anti-OTX2, 1/300, Rabbit anti-NEUN, 1/500 (both  
468 Millipore), Mouse anti-NESTIN, 1/300 (BD), Mouse anti-N-CAD, 1/100 (Life technologies),  
469 Mouse anti-ki67, 1/1000 (Leica biosystems), Rabbit anti-PH3, 1/1000, Rabbit anti-TBR1,  
470 1/500, Rat anti-CTIP2, 1/500, Mouse anti-SATB2, 1/50 (all from Abcam).

471 To measure cell proliferation, cultures were incubated with 10  $\mu$ M EdU (5-ethynyl-2'-  
472 deoxyuridine) for 30 min before fixation in the case of hESC cultures and 2 h for NPC cultures.  
473 EdU detection was carried out using the Click-iT EdU Alexa Fluor 488/555 imaging kit as per  
474 manufacturer instructions (Life Technologies).

475 Images were acquired using a DMI600b inverted microscope (Leica Microsystems). Cell  
476 counting was carried out using the CellProfiler or FIJI (Nucleus counter or cell counter plugins)  
477 software to analyse a minimum of 5-10 randomly placed fields of view per stain. Data were  
478 collected from two to five independent differentiation runs, sample size (n) per experiment and  
479 genotype indicated in the Figure legends.

#### 480 **Quantitative RT-PCR (qPCR)**

481 Total RNA was extracted using TRIzol (Invitrogen) and treated with TURBO DNA-free  
482 (Ambion). cDNA was generated using qScript cDNA synthesis kit (Quanta Biosciences).  
483 qPCR was performed with Mesa Green qPCR master mix (Eurogentec) with specific primers  
484 listed in (primers Supplementary Table 1). When possible, primers were designed to  
485 encompass exon-exon junctions. Cq values were normalised to *GAPDH* housekeeping  
486 reference gene and changes in expression level were calculated using the  $2^{-\Delta\Delta CT}$  method(63).  
487 All data were obtained from 3 independent differentiations with PCR carried out in 2  
488 independent runs each with three technical replicates. All PCRs were run on a QuantStudio  
489 Real-time PCR machine (Applied Biosystems).

#### 490 **Flow cytometry**

491 Cultured CNPs at differentiation day 34 were dissociated in Accutase (ThermoFisher) for 10  
492 minutes at 37°C, then washed in PBS and counted. Samples containing  $3 \times 10^6$  cells were fixed  
493 in 70% EtOH at -20°C overnight. The cells were washed three times in DPBS and blocked in  
494 solution 1%BSA-3% donkey serum for 45 minutes. Following Mouse anti-NESTIN (1/300,

495 BD) antibody in 1% BSA-1% donkey serum or mouse anti IgG, 2h at RT. Cells were washed  
496 in PBS three times and incubated in secondary antibody (alexa488 1:1000, Life technologies)  
497 in 1% BSA-1% donkey serum for 1h at RT. Cells were washed twice in PBS and incubated  
498 with RNaseA (200 µg/ml, ThermoFisher) for 30 minutes. Then centrifuged and treated with  
499 DAPI (0.3 µg/ml, ThermoFisher) for 10 minutes. Cells were washed twice in DPBS and  
500 resuspended in 0.5 ml to be filtrated to remove clumps (Corning™ Falcon™ Test Tube with  
501 Cell Strainer Snap Cap). The samples were analysed on a BD LSRFortessa cell analyser (BD  
502 Biosciences). Data was analyzed in FlowJo (BD Biosciences) and Statistical analysis was  
503 performed in SPSS (IBM).

#### 504 **Growth curve study**

505 Cells were seeded in triplicate at 50,000 cells/well onto poly-D-lysine/laminin coated 48 well  
506 plates at day 19. Retinol-free B27 was used for the first 25 days, followed by normal B27 from  
507 day 26 onwards. Cells were dissociated into single cells every 4-5 days and counted manually  
508 in a Neubauer chamber.

#### 509 **RNAseq**

510 RNA was extracted and purified using the PureLink RNA Mini Kit (Thermofisher Scientific).  
511 Libraries were prepared using the TruSeq Stranded mRNA kit (Illumina) from 1µg RNA  
512 extracted from 3 biological replicate samples each collected at 3 time points of differentiation  
513 (days 15, 21, and 34, n=9 each for SETBP1<sup>-/-</sup> and the isogenic control cells, respectively).  
514 75bp paired-end sequencing was performed on a HiSeq 4000 sequencer (Illumina, USA)  
515 yielding 30 – 45 million reads per sample. Reads were mapped to the human genome  
516 (GRCh38) using Burrows-Wheeler Aligner algorithms(64) and individual gene read counts  
517 calculated using featureCounts(65). DeSeq2 was used to calculate differential gene expression  
518 with a cut-off of adjusted p-value<0.1, FDR of 10% and a FC>1.5 (66). Gene Ontology  
519 functional enrichment for biological processes was performed using DAVID (v6.8) for the top

520 1000 more significant genes (ranked for p adjusted and FC value), with all the protein coding  
521 genes in our dataset as background (67). Calculated p values were adjusted for multiple testing  
522 using the Benjamin-Hochberg correction. Raw sequence data files are publicly available from  
523 the NCBI Gene Expression Omnibus (GSE180185).

### 524 **Western Blotting**

525 Protein extraction was performed with RIPA buffer (NEB) in the presence of protease and  
526 phosphatase inhibitors (Sigma) and quantified using the Bio-Rad DC protein assay (Bio-Rad).  
527 Total protein lysates (10-15 ug) were resolved in Bolt bistris plus 4-12% gels (Life  
528 technologies). PVDF membranes were blocked for 2h in 5% (w/v) BSA TBST buffer and the  
529 following primary antibodies diluted in blocking buffer were used: Mouse anti-GAPDH  
530 (1/5000, Abcam), mouse anti-B-catenin (sc7963, 1/1000, Santa Cruz Biotechnology), rabbit  
531 anti-P-Ser552 B-catenin (1/500, Cell signalling), rabbit anti-P-Ser675 B-catenin (1/500, Cell  
532 signalling), rabbit anti-LRP6 (1/500, Cell signalling), rabbit anti-P-LRP6 (1/500, Cell  
533 signalling). Incubation was performed overnight at 4C and primary antibodies were detected  
534 with anti-rabbit and anti-mouse HRP antibodies (Abcam) using the Luminata Crescendo  
535 Western HRP substrate (Millipore). Protein samples from 3 independent differentiations were  
536 analysed except the XAV treatment analysis where 2 rounds of differentiation were performed.

### 537 **Statistical Analysis**

538 Statistical analyses were performed using IBM SPSS 23 software. Student's T test or Mann-  
539 Withney U test were used for comparisons between two groups. One-way ANOVA and  
540 Kruskal-Wallis Test were used for comparisons between three groups Statistically significant  
541 differences were considered when  $p\text{-value} \leq 0.05$ . Two-tailed test was used unless indicated  
542 otherwise.

543 **Acknowledgements:** We thank Dr. Robert Andrews and Dr. Daniel Cabezas de la Fuente for  
544 invaluable assistance with RNAseq data analysis. We acknowledge Ms. Eliza Wide  
545 contribution to the study during her MSc project. Thanks also to all members of the Li  
546 laboratory for helpful discussions during the course of this study. RNAseq was performed at  
547 the Oxford Genomics Centre.

548 This work was funded by the Medical Research Council of the United Kingdom grant 506390.

549 **Author Contributions:** L.F.C. and M.L. conceived and designed the study. L.F.C. carried out  
550 and analysed the data. L.F.C. and M.L. interpreted the data and wrote the paper.

551 **Competing interests:** Authors declare no financial disclosures or conflict of interest.

## 552 References

- 553 1. Douglas RJ, Martin KA (2004): Neuronal circuits of the neocortex. *Annu Rev Neurosci* 27: 419-  
554 51.
- 555 2. Shepherd GM (2013): Corticostriatal connectivity and its role in disease. *Nat Rev Neurosci*  
556 14: 278-91.
- 557 3. Molyneaux BJ, Arlotta P, Menezes JR, Macklis JD (2007): Neuronal subtype specification in  
558 the cerebral cortex. *Nat Rev Neurosci* 8: 427-37.
- 559 4. Fitzgerald MP, Covio M, Lee KS (2011): Disturbances in the positioning, proliferation and  
560 apoptosis of neural progenitors contribute to subcortical band heterotopia formation.  
561 *Neuroscience* 176: 455-71.
- 562 5. Vaccarino FM, Grigorenko EL, Smith KM, Stevens HE (2009): Regulation of cerebral cortical  
563 size and neuron number by fibroblast growth factors: implications for autism. *J Autism Dev*  
564 *Disord* 39: 511-20.
- 565 6. Cavallin M, Rujano MA, Bednarek N, Medina-Cano D, Bernabe Gelot A, Drunat S, Maillard C,  
566 Garfa-Traore M, Bole C, Nitschke P, Beneteau C, Besnard T, Cogne B, Eveillard M, Kuster A,  
567 Poirier K, Verloes A, Martinovic J, Bidat L, Rio M, Lyonnet S, Reilly ML, Boddaert N, Jenneson-  
568 Liver M, Motte J, Doco-Fenzy M, Chelly J, Attie-Bitach T, Simons M, Cantagrel V, Passemard  
569 S, Baffet A, Thomas S, Bahi-Buisson N (2017): WDR81 mutations cause extreme  
570 microcephaly and impair mitotic progression in human fibroblasts and Drosophila neural  
571 stem cells. *Brain* 140: 2597-2609.
- 572 7. Breuss M, Heng JI, Poirier K, Tian G, Jaglin XH, Qu Z, Braun A, Gstrein T, Ngo L, Haas M, Bahi-  
573 Buisson N, Moutard ML, Passemard S, Verloes A, Gressens P, Xie Y, Robson KJ, Rani DS,  
574 Thangaraj K, Clausen T, Chelly J, Cowan NJ, Keays DA (2012): Mutations in the beta-tubulin  
575 gene TUBB5 cause microcephaly with structural brain abnormalities. *Cell Rep* 2: 1554-62.
- 576 8. Filges I, Shimojima K, Okamoto N, Röthlisberger B, Weber P, Huber AR, Nishizawa T, Datta  
577 AN, Miny P, Yamamoto T (2011): Reduced expression by SETBP1 haploinsufficiency causes  
578 developmental and expressive language delay indicating a phenotype distinct from Schinzel-  
579 Giedion syndrome. *Journal of Medical Genetics* 48: 117-122.
- 580 9. Marseglia G, Scordo M, Pescucci C, Nannetti G, Biagini E, Scandurra V, Gerundino F, Magi A,  
581 Benelli M, Torricelli F (2012): 372 kb microdeletion in 18q12.3 causing SETBP1  
582 haploinsufficiency associated with mild mental retardation and expressive speech  
583 impairment. *European Journal of Medical Genetics* 55: 216-221.
- 584 10. Schinzel A, Binkert F, Lillington DM, Sands M, Stocks RJ, Lindenbaum RH, Matthews H,  
585 Sheridan H (1991): Interstitial deletion of the long arm of chromosome 18,  
586 del(18)(q12.2q21.1): a report of three cases of an autosomal deletion with a mild  
587 phenotype. *J Med Genet* 28: 352-5.
- 588 11. Imataka G, Ohwada Y, Shimura N, Yoshihara S, Arisaka O (2015): Del(18)(q12.2q21.1)  
589 syndrome: a case report and clinical review of the literature. *Eur Rev Med Pharmacol Sci* 19:  
590 3241-5.
- 591 12. Bouquillon S, Andrieux J, Landais E, Duban-Bedu B, Boidein F, Lenne B, Vallée L, Leal T, Doco-  
592 Fenzy M, Delobel B (2011): A 5.3Mb deletion in chromosome 18q12.3 as the smallest region  
593 of overlap in two patients with expressive speech delay. *European Journal of Medical*  
594 *Genetics* 54: 194-197.
- 595 13. Tinkle BT, Christianson CA, Schorry EK, Webb T, Hopkin RJ (2003): Long-term survival in a  
596 patient with del(18)(q12.2q21.1). *American Journal of Medical Genetics Part A* 119A: 66-70.
- 597 14. Jansen NA, Braden RO, Srivastava S, Otness EF, Lesca G, Rossi M, Nizon M, Bernier RA,  
598 Quelin C, van Haeringen A, Kleefstra T, Wong MMK, Whalen S, Fisher SE, Morgan AT, van  
599 Bon BW (2021): Clinical delineation of SETBP1 haploinsufficiency disorder. *Eur J Hum Genet*.
- 600 15. Cody JD, Sebold C, Malik A, Heard P, Carter E, Crandall A, Soileau B, Semrud-Clikeman M,  
601 Cody CM, Hardies JL, Li J, Lancaster J, Fox PT, Stratton RF, Perry B, Hale DE (2007): Recurrent



- 602 interstitial deletions of proximal 18q: A new syndrome involving expressive speech delay.  
603 *American Journal of Medical Genetics Part A* 143A: 1181-1190.
- 604 16. Kornilov SA, Rakhlin N, Kuposov R, Lee M, Yrigollen C, Caglayan AO, Magnuson JS, Mane S,  
605 Chang JT, Grigorenko EL (2016): Genome-Wide Association and Exome Sequencing Study of  
606 Language Disorder in an Isolated Population. *Pediatrics* 137.
- 607 17. Piazza R, Valletta S, Winkelmann N, Redaelli S, Spinelli R, Pirola A, Antolini L, Mologni L,  
608 Donadoni C, Papaemmanuil E, Schnittger S, Kim DW, Boulwood J, Rossi F, Gaipa G, De  
609 Martini GP, di Celle PF, Jang HG, Fantin V, Bignell GR, Magistroni V, Haferlach T, Pogliani EM,  
610 Campbell PJ, Chase AJ, Tapper WJ, Cross NC, Gambacorti-Passerini C (2013): Recurrent  
611 SETBP1 mutations in atypical chronic myeloid leukemia. *Nat Genet* 45: 18-24.
- 612 18. Hoischen A, van Bon BW, Gilissen C, Arts P, van Lier B, Stehouwer M, de Vries P, de Reuver  
613 R, Wieskamp N, Mortier G, Devriendt K, Amorim MZ, Revencu N, Kidd A, Barbosa M, Turner  
614 A, Smith J, Oley C, Henderson A, Hayes IM, Thompson EM, Brunner HG, de Vries BB, Veltman  
615 JA (2010): De novo mutations of SETBP1 cause Schinzel-Giedion syndrome. *Nat Genet* 42:  
616 483-5.
- 617 19. Ko JM, Lim BC, Kim KJ, Hwang YS, Ryu HW, Lee JH, Kim JS, Chae JH (2013): Distinct  
618 neurological features in a patient with Schinzel-Giedion syndrome caused by a recurrent  
619 SETBP1 mutation. *Childs Nerv Syst* 29: 525-9.
- 620 20. Carvalho E, Honjo R, Magalhaes M, Yamamoto G, Rocha K, Naslavsky M, Zatz M, Passos-  
621 Bueno MR, Kim C, Bertola D (2015): Schinzel-Giedion syndrome in two Brazilian patients:  
622 Report of a novel mutation in SETBP1 and literature review of the clinical features. *Am J Med*  
623 *Genet A* 167A: 1039-46.
- 624 21. Gonzalez F, Zhu Z, Shi ZD, Lelli K, Verma N, Li QV, Huangfu D (2014): An iCRISPR platform for  
625 rapid, multiplexable, and inducible genome editing in human pluripotent stem cells. *Cell*  
626 *Stem Cell* 15: 215-226.
- 627 22. Cong L, Ran FA, Cox D, Lin S, Barretto R, Habib N, Hsu PD, Wu X, Jiang W, Marraffini LA,  
628 Zhang F (2013): Multiplex genome engineering using CRISPR/Cas systems. *Science* 339: 819-  
629 23.
- 630 23. Ran FA, Hsu PD, Wright J, Agarwala V, Scott DA, Zhang F (2013): Genome engineering using  
631 the CRISPR-Cas9 system. *Nat Protoc* 8: 2281-2308.
- 632 24. Chambers SM, Fasano CA, Papapetrou EP, Tomishima M, Sadelain M, Studer L (2009): Highly  
633 efficient neural conversion of human ES and iPS cells by dual inhibition of SMAD signaling.  
634 *Nat Biotechnol* 27: 275-80.
- 635 25. Arber C, Precious SV, Cambray S, Risner-Janiczek JR, Kelly C, Noakes Z, Fjodorova M, Heuer A,  
636 Ungless MA, Rodriguez TA, Rosser AE, Dunnett SB, Li M (2015): Activin A directs striatal  
637 projection neuron differentiation of human pluripotent stem cells. *Development* 142: 1375-  
638 86.
- 639 26. Gotz M, Huttner WB (2005): The cell biology of neurogenesis. *Nat Rev Mol Cell Biol* 6: 777-  
640 88.
- 641 27. Rash BG, Grove EA (2006): Area and layer patterning in the developing cerebral cortex. *Curr*  
642 *Opin Neurobiol* 16: 25-34.
- 643 28. Espuny-Camacho I, Michelsen KA, Gall D, Linaro D, Hasche A, Bonnefont J, Bali C, Orduz D,  
644 Bilheu A, Herpoel A, Lambert N, Gaspard N, Peron S, Schiffmann SN, Giugliano M, Gaillard A,  
645 Vanderhaeghen P (2013): Pyramidal neurons derived from human pluripotent stem cells  
646 integrate efficiently into mouse brain circuits in vivo. *Neuron* 77: 440-56.
- 647 29. Gaspard N, Bouschet T, Hourez R, Dimidschstein J, Naeije G, van den Aemele J, Espuny-  
648 Camacho I, Herpoel A, Passante L, Schiffmann SN, Gaillard A, Vanderhaeghen P (2008): An  
649 intrinsic mechanism of corticogenesis from embryonic stem cells. *Nature* 455: 351-7.
- 650 30. Li Y, Muffat J, Omer A, Bosch I, Lancaster MA, Sur M, Gehrke L, Knoblich JA, Jaenisch R  
651 (2017): Induction of Expansion and Folding in Human Cerebral Organoids. *Cell Stem Cell* 20:  
652 385-396 e3.



- 653 31. Mairet-Coello G, Tury A, Van Buskirk E, Robinson K, Genestine M, DiCicco-Bloom E (2012):  
654 p57(KIP2) regulates radial glia and intermediate precursor cell cycle dynamics and lower  
655 layer neurogenesis in developing cerebral cortex. *Development* 139: 475-87.
- 656 32. Moon RT, Kohn AD, De Ferrari GV, Kaykas A (2004): WNT and beta-catenin signalling:  
657 diseases and therapies. *Nat Rev Genet* 5: 691-701.
- 658 33. Reya T, Clevers H (2005): Wnt signalling in stem cells and cancer. *Nature* 434: 843-50.
- 659 34. Wahane SD, Hellbach N, Prentzell MT, Weise SC, Vezzali R, Kreutz C, Timmer J, Kriegelstein K,  
660 Thedieck K, Vogel T (2014): PI3K-p110-alpha-subtype signalling mediates survival,  
661 proliferation and neurogenesis of cortical progenitor cells via activation of mTORC2. *J*  
662 *Neurochem* 130: 255-67.
- 663 35. Poon CL, Mitchell KA, Kondo S, Cheng LY, Harvey KF (2016): The Hippo Pathway Regulates  
664 Neuroblasts and Brain Size in *Drosophila melanogaster*. *Curr Biol* 26: 1034-42.
- 665 36. Bejoy J, Song L, Li Y (2016): Wnt-YAP interactions in the neural fate of human pluripotent  
666 stem cells and the implications for neural organoid formation. *Organogenesis* 12: 1-15.
- 667 37. Kim W, Kim M, Jho EH (2013): Wnt/beta-catenin signalling: from plasma membrane to  
668 nucleus. *Biochem J* 450: 9-21.
- 669 38. MacDonald BT, Tamai K, He X (2009): Wnt/beta-catenin signaling: components, mechanisms,  
670 and diseases. *Dev Cell* 17: 9-26.
- 671 39. Fang D, Hawke D, Zheng Y, Xia Y, Meisenhelder J, Nika H, Mills GB, Kobayashi R, Hunter T, Lu  
672 Z (2007): Phosphorylation of beta-catenin by AKT promotes beta-catenin transcriptional  
673 activity. *J Biol Chem* 282: 11221-9.
- 674 40. Taurin S, Sandbo N, Qin Y, Browning D, Dulin NO (2006): Phosphorylation of beta-catenin by  
675 cyclic AMP-dependent protein kinase. *J Biol Chem* 281: 9971-6.
- 676 41. Zeng X, Huang H, Tamai K, Zhang X, Harada Y, Yokota C, Almeida K, Wang J, Doble B,  
677 Woodgett J, Wynshaw-Boris A, Hsieh JC, He X (2008): Initiation of Wnt signaling: control of  
678 Wnt coreceptor Lrp6 phosphorylation/activation via frizzled, dishevelled and axin functions.  
679 *Development* 135: 367-75.
- 680 42. Zeng X, Tamai K, Doble B, Li S, Huang H, Habas R, Okamura H, Woodgett J, He X (2005): A  
681 dual-kinase mechanism for Wnt co-receptor phosphorylation and activation. *Nature* 438:  
682 873-7.
- 683 43. Huang SM, Mishina YM, Liu S, Cheung A, Stegmeier F, Michaud GA, Charlat O, Wiellette E,  
684 Zhang Y, Wiessner S, Hild M, Shi X, Wilson CJ, Mickanin C, Myer V, Fazal A, Tomlinson R,  
685 Serluca F, Shao W, Cheng H, Shultz M, Rau C, Schirle M, Schlegl J, Ghidelli S, Fawell S, Lu C,  
686 Curtis D, Kirschner MW, Lengauer C, Finan PM, Tallarico JA, Bouwmeester T, Porter JA, Bauer  
687 A, Cong F (2009): Tankyrase inhibition stabilizes axin and antagonizes Wnt signalling. *Nature*  
688 461: 614-20.
- 689 44. Malatesta P, Hartfuss E, Gotz M (2000): Isolation of radial glial cells by fluorescent-activated  
690 cell sorting reveals a neuronal lineage. *Development* 127: 5253-63.
- 691 45. Rakic P (1995): A small step for the cell, a giant leap for mankind: a hypothesis of neocortical  
692 expansion during evolution. *Trends Neurosci* 18: 383-8.
- 693 46. Huttner WB, Kosodo Y (2005): Symmetric versus asymmetric cell division during  
694 neurogenesis in the developing vertebrate central nervous system. *Curr Opin Cell Biol* 17:  
695 648-57.
- 696 47. Chenn A, Walsh CA (2002): Regulation of cerebral cortical size by control of cell cycle exit in  
697 neural precursors. *Science* 297: 365-9.
- 698 48. Brennand KJ, Simone A, Jou J, Gelboin-Burkhardt C, Tran N, Sangar S, Li Y, Mu Y, Chen G, Yu D,  
699 McCarthy S, Sebat J, Gage FH (2011): Modelling schizophrenia using human induced  
700 pluripotent stem cells. *Nature* 473: 221-5.
- 701 49. Topol A, Zhu S, Tran N, Simone A, Fang G, Brennand KJ (2015): Altered WNT Signaling in  
702 Human Induced Pluripotent Stem Cell Neural Progenitor Cells Derived from Four  
703 Schizophrenia Patients. *Biol Psychiatry* 78: e29-34.

- 704 50. Srikanth P, Han K, Callahan DG, Makovkina E, Muratore CR, Lalli MA, Zhou H, Boyd JD, Kosik  
705 KS, Selkoe DJ, Young-Pearse TL (2015): Genomic DISC1 Disruption in hiPSCs Alters Wnt  
706 Signaling and Neural Cell Fate. *Cell Rep* 12: 1414-29.
- 707 51. Wang P, Lin M, Pedrosa E, Hrabovsky A, Zhang Z, Guo W, Lachman HM, Zheng D (2015):  
708 CRISPR/Cas9-mediated heterozygous knockout of the autism gene CHD8 and  
709 characterization of its transcriptional networks in neurodevelopment. *Mol Autism* 6: 55.
- 710 52. Kwan V, Unda BK, Singh KK (2016): Wnt signaling networks in autism spectrum disorder and  
711 intellectual disability. *J Neurodev Disord* 8: 45.
- 712 53. Bernier R, Golzio C, Xiong B, Stessman HA, Coe BP, Penn O, Witherspoon K, Gerdtts J, Baker C,  
713 Vulto-van Silfhout AT, Schuurs-Hoeijmakers JH, Fichera M, Bosco P, Buono S, Alberti A, Failla  
714 P, Peeters H, Steyaert J, Vissers L, Francescatto L, Mefford HC, Rosenfeld JA, Bakken T,  
715 O'Roak BJ, Pawlus M, Moon R, Shendure J, Amaral DG, Lein E, Rankin J, Romano C, de Vries  
716 BBA, Katsanis N, Eichler EE (2014): Disruptive CHD8 mutations define a subtype of autism  
717 early in development. *Cell* 158: 263-276.
- 718 54. Cristobal I, Blanco FJ, Garcia-Orti L, Marcotegui N, Vicente C, Rifon J, Novo FJ, Bandres E,  
719 Calasanz MJ, Bernabeu C, Odero MD (2010): SETBP1 overexpression is a novel leukemogenic  
720 mechanism that predicts adverse outcome in elderly patients with acute myeloid leukemia.  
721 *Blood* 115: 615-25.
- 722 55. Oakley K, Han Y, Vishwakarma BA, Chu S, Bhatia R, Gudmundsson KO, Keller J, Chen X, Vasko  
723 V, Jenkins NA, Copeland NG, Du Y (2012): Setbp1 promotes the self-renewal of murine  
724 myeloid progenitors via activation of Hoxa9 and Hoxa10. *Blood* 119: 6099-108.
- 725 56. Vishwakarma BA, Nguyen N, Makishima H, Hosono N, Gudmundsson KO, Negi V, Oakley K,  
726 Han Y, Przychodzen B, Maciejewski JP, Du Y (2016): Runx1 repression by histone  
727 deacetylation is critical for Setbp1-induced mouse myeloid leukemia development. *Leukemia*  
728 30: 200-8.
- 729 57. Piazza R, Magistroni V, Redaelli S, Mauri M, Massimino L, Sessa A, Peronaci M, Lalowski M,  
730 Soliymani R, Mezzatesta C, Pirola A, Banfi F, Rubio A, Rea D, Stagno F, Usala E, Martino B,  
731 Campiotti L, Merli M, Passamonti F, Onida F, Morotti A, Pavesi F, Bregni M, Broccoli V,  
732 Baumann M, Gambacorti-Passerini C (2018): SETBP1 induces transcription of a network of  
733 development genes by acting as an epigenetic hub. *Nat Commun* 9: 2192.
- 734 58. Banfi F, Rubio A, Zaghi M, Massimino L, Fagnocchi G, Bellini E, Luoni M, Cancellieri C, Bagliani  
735 A, Di Resta C, Maffezzini C, Ianielli A, Ferrari M, Piazza R, Mologni L, Broccoli V, Sessa A  
736 (2021): SETBP1 accumulation induces P53 inhibition and genotoxic stress in neural  
737 progenitors underlying neurodegeneration in Schinzel-Giedion syndrome. *Nat Commun* 12:  
738 4050.
- 739 59. Smith R, Huang YT, Tian T, Vojtasova D, Mesalles-Naranjo O, Pollard SM, Pratt T, Price DJ,  
740 Fotaki V (2017): The Transcription Factor Foxg1 Promotes Optic Fissure Closure in the Mouse  
741 by Suppressing Wnt8b in the Nasal Optic Stalk. *J Neurosci* 37: 7975-7993.
- 742 60. Fotaki V, Smith R, Pratt T, Price DJ (2013): Foxg1 is required to limit the formation of ciliary  
743 margin tissue and Wnt/beta-catenin signalling in the developing nasal retina of the mouse.  
744 *Dev Biol* 380: 299-313.
- 745 61. Shen Q, Wang Y, Dimos JT, Fasano CA, Phoenix TN, Lemischka IR, Ivanova NB, Stifani S,  
746 Morrissey EE, Temple S (2006): The timing of cortical neurogenesis is encoded within lineages  
747 of individual progenitor cells. *Nat Neurosci* 9: 743-51.
- 748 62. Danesin C, Peres JN, Johansson M, Snowden V, Cording A, Papalopulu N, Houart C (2009):  
749 Integration of telencephalic Wnt and hedgehog signaling center activities by Foxg1. *Dev Cell*  
750 16: 576-87.
- 751 63. Livak KJ, Schmittgen TD (2001): Analysis of relative gene expression data using real-time  
752 quantitative PCR and the 2(-Delta Delta C(T)) Method. *Methods* 25: 402-8.
- 753 64. Li H, Durbin R (2009): Fast and accurate short read alignment with Burrows-Wheeler  
754 transform. *Bioinformatics* 25: 1754-60.

- 755 65. Liao Y, Smyth GK, Shi W (2014): featureCounts: an efficient general purpose program for  
756 assigning sequence reads to genomic features. *Bioinformatics* 30: 923-30.
- 757 66. Love MI, Huber W, Anders S (2014): Moderated estimation of fold change and dispersion for  
758 RNA-seq data with DESeq2. *Genome Biol* 15: 550.
- 759 67. Huang da W, Sherman BT, Lempicki RA (2009): Systematic and integrative analysis of large  
760 gene lists using DAVID bioinformatics resources. *Nat Protoc* 4: 44-57.
- 761
